# Supplementary material for: Four cyclometalated Ir(iii) complexes and insights into their luminescence, cytotoxicity and DNA/BSA binding performance
Source: Royal Society of Chemistry journal article supplement (doi:10.1039/d4ra04408h), 2024-01-01
Supplement: d4ra04408h1.pdf [file d4ra04408h1.pdf]

## Supporting Information

### **Four cyclometalated Ir(III) complexes and Insights into their luminescence, cytotoxicity and DNA/BSA binding performance**

Qianshui Yu<sup>a</sup>, Shunxin Gu<sup>a</sup>, Xinda Yang<sup>b</sup>, Pengfei Shi<sup>a\*</sup> and Qin Jiang<sup>a\*</sup>

---

<sup>a</sup>School of Environmental and Chemical Engineering, Jiangsu Ocean University, Lianyungang, 222005, P.R. China

<sup>b</sup>Shanghai Key Laboratory of Chemical Assessment and Sustainability, School of Chemical Science and Engineering, Tongji University, Shanghai 200120, P. R. China

Corresponding email: [jiangqin@jou.edu.cn](mailto:jiangqin@jou.edu.cn), [shipf@jou.edu.cn](mailto:shipf@jou.edu.cn)

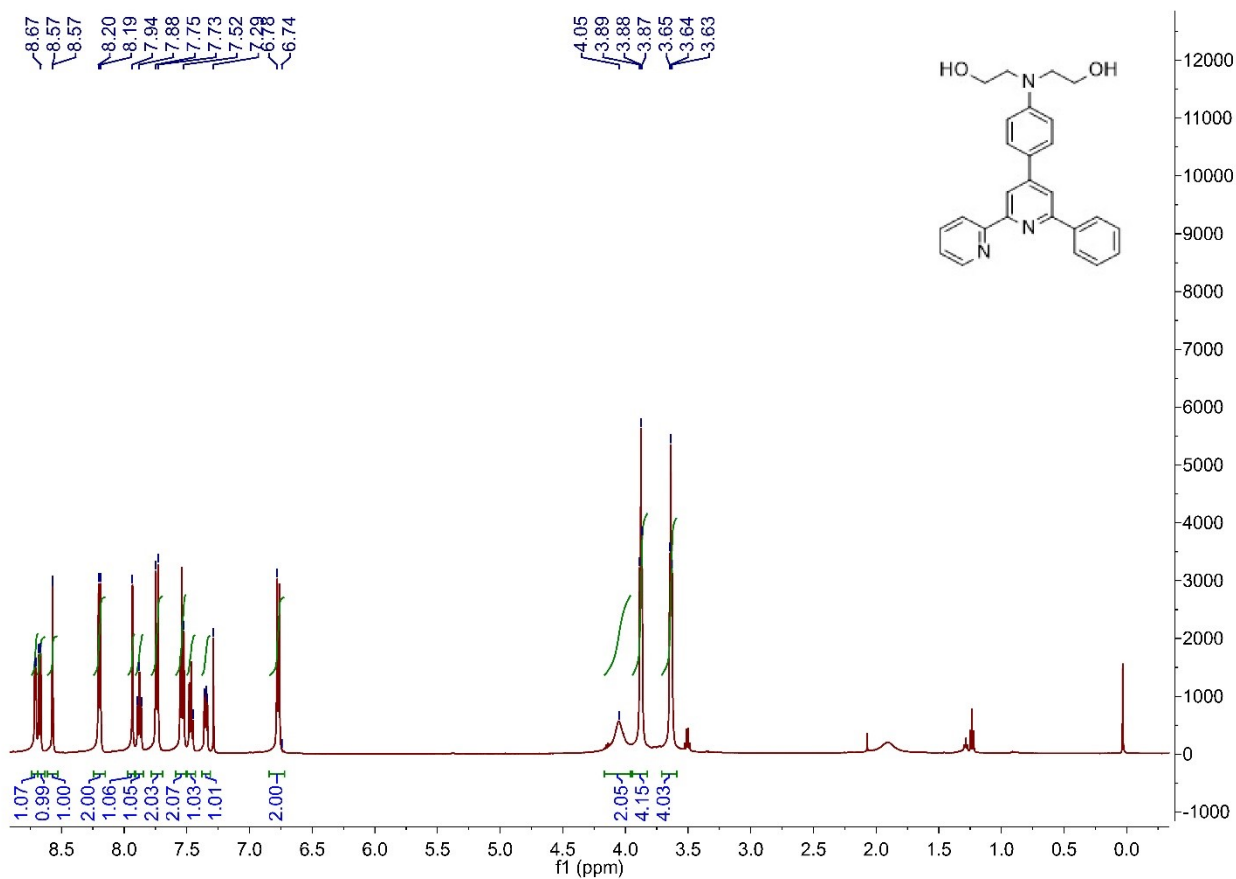

Fig. S1 <sup>1</sup>H NMR spectrum of PhbpyOH in CDCl<sub>3</sub>

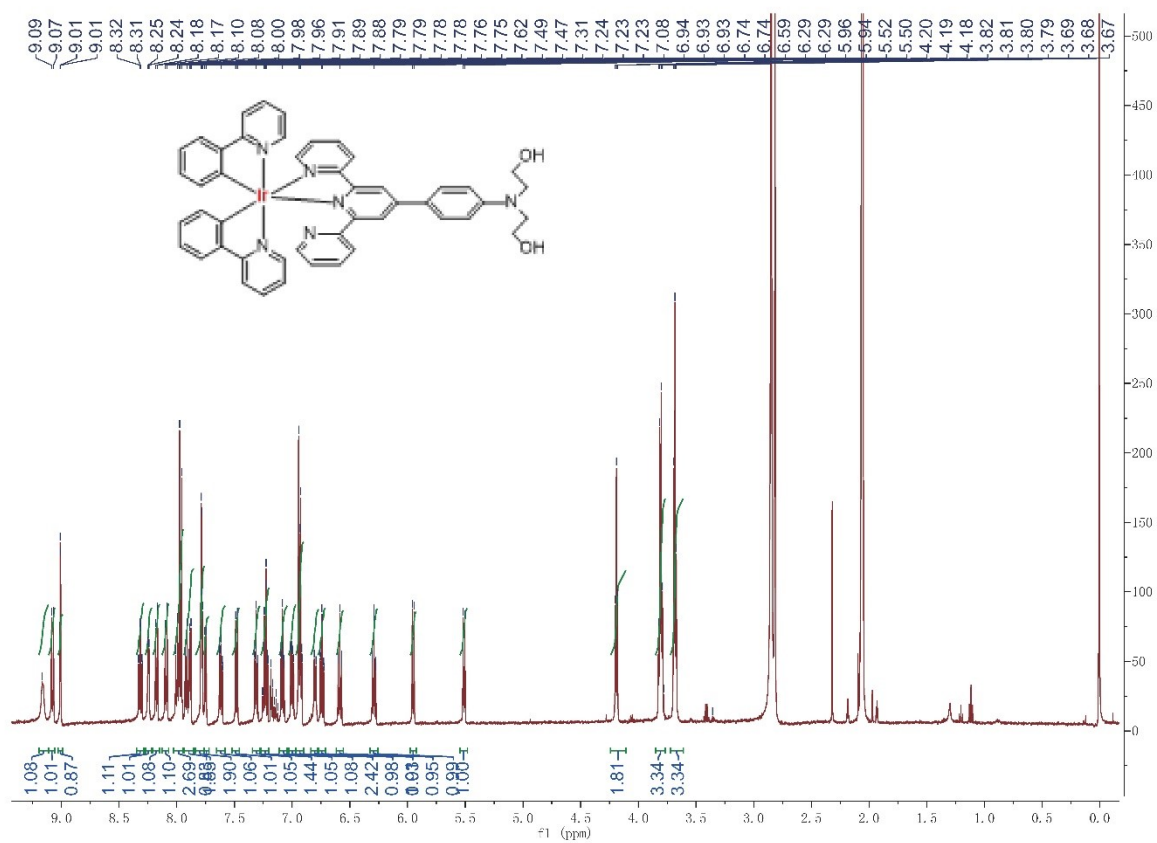

Fig. S2 <sup>1</sup>H NMR spectrum of Ir1A in d<sub>6</sub>-acetone

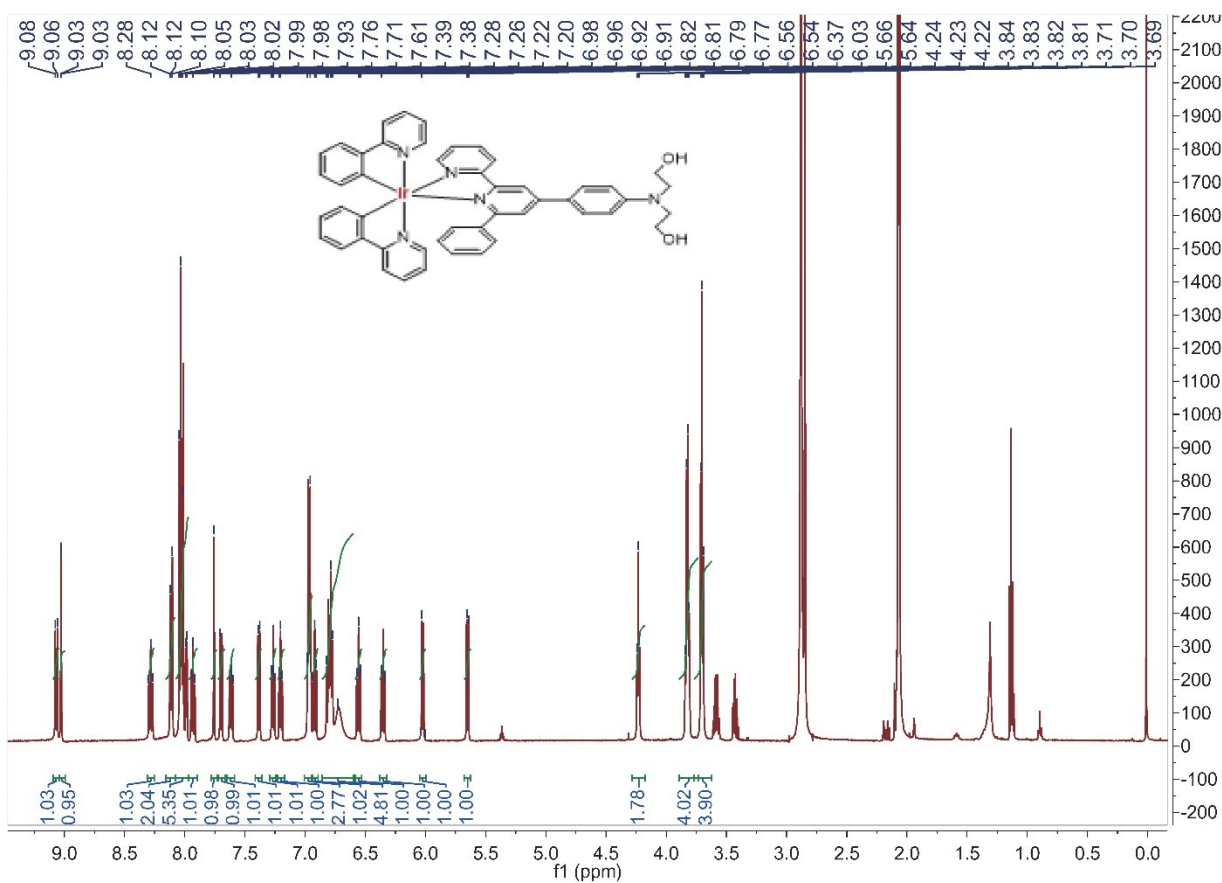

Fig. S3 <sup>1</sup>H NMR spectrum of Ir1B in d<sub>6</sub>-acetone

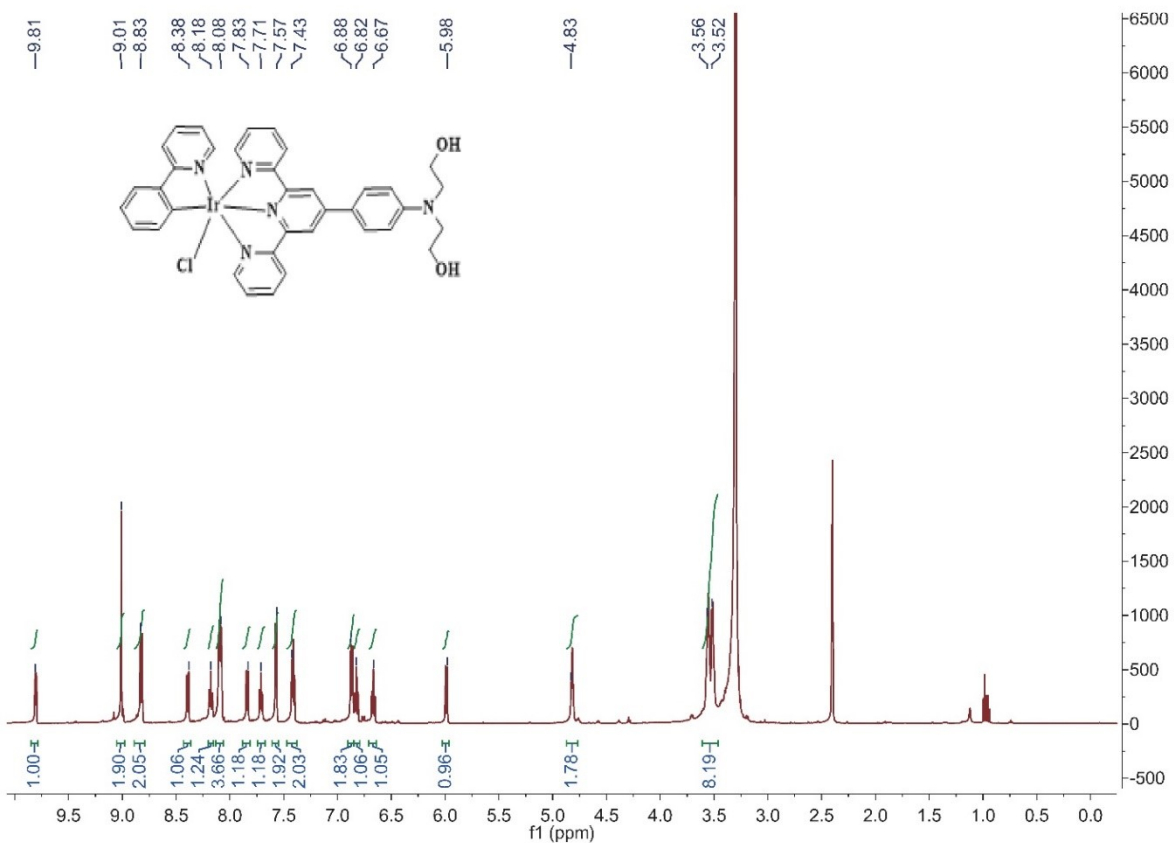

Fig. S4 <sup>1</sup>H NMR spectrum of Ir2A in d<sub>6</sub>-DMSO

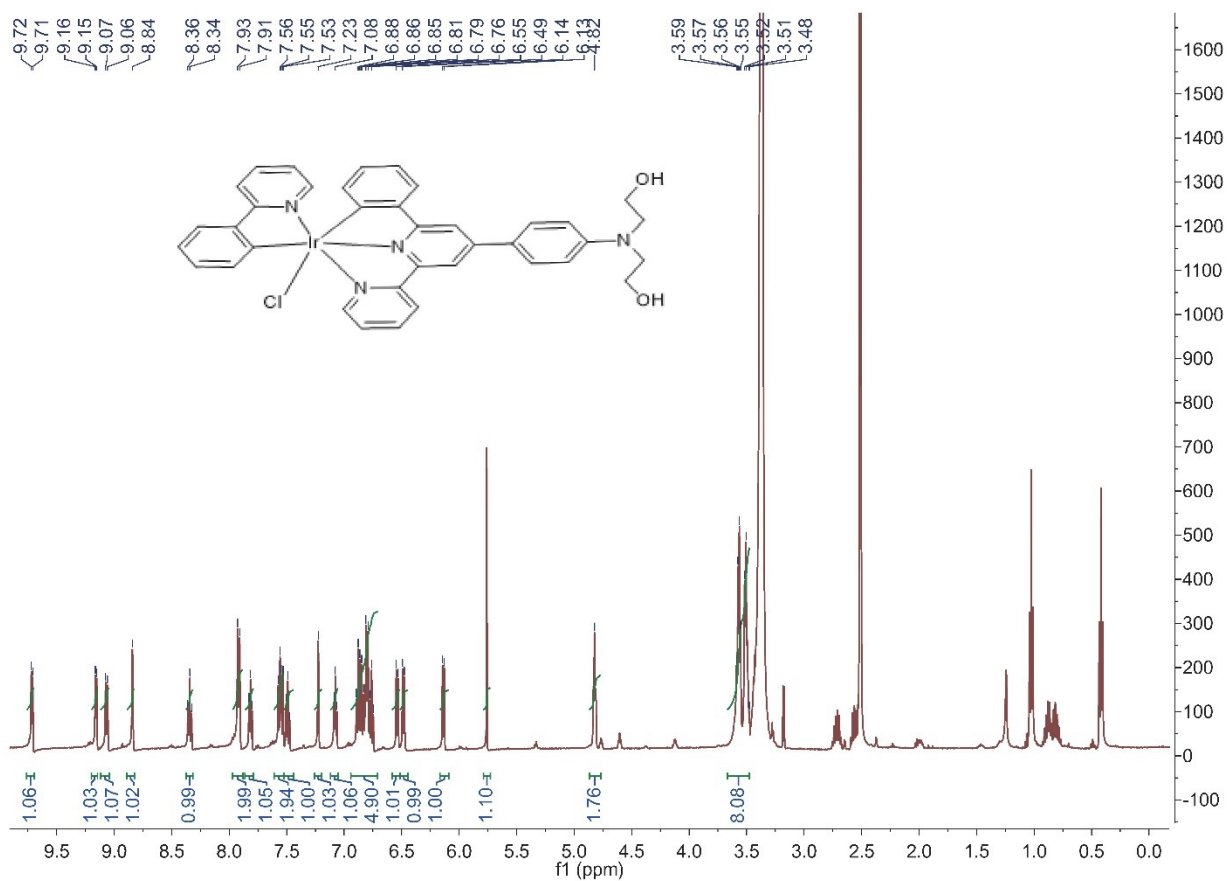

Fig. S5  $^1\text{H}$ NMR spectrum of Ir2B in  $\text{d}_6$ -DMSO

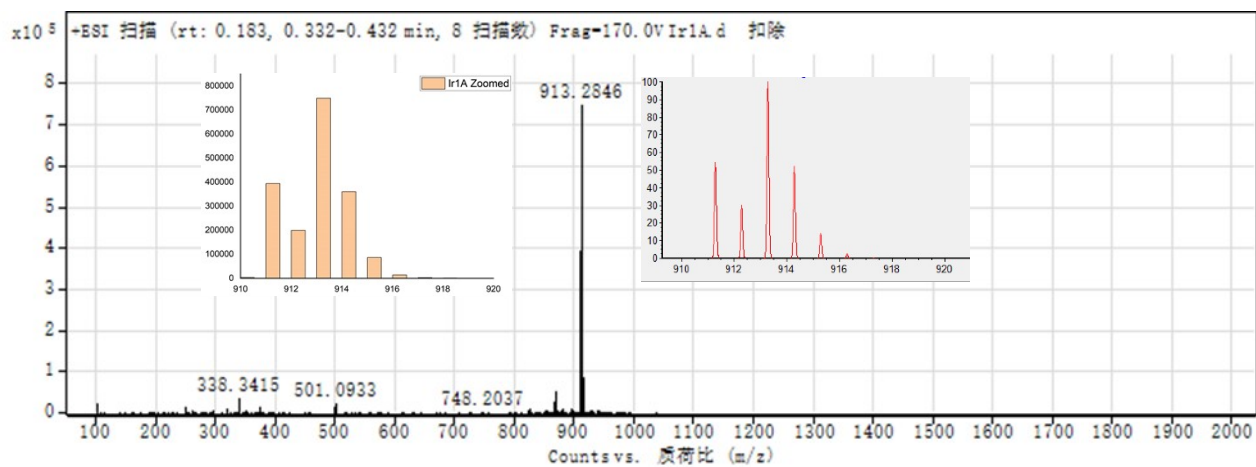

Fig.S6 ESI-MS for complex Ir1A. Inserted are the zoomed mass spectrum (yellow) and simulated isotope distribution using IsoPro 3.0 (red)

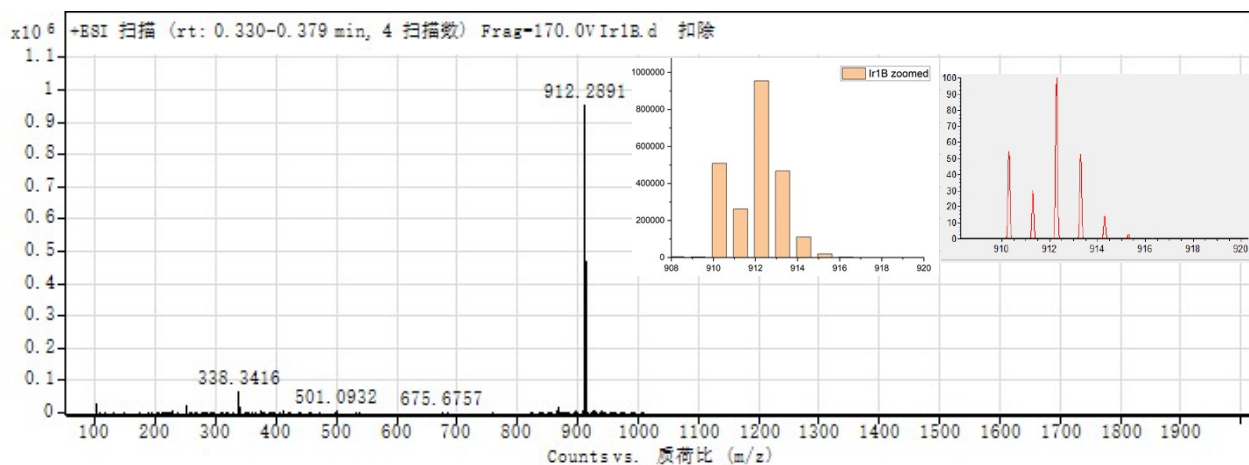

Fig.S7 ESI-MS for complex Ir1B. Inserted are the zoomed mass spectrum (yellow) and simulated isotope distribution using IsoPro 3.0 (red)

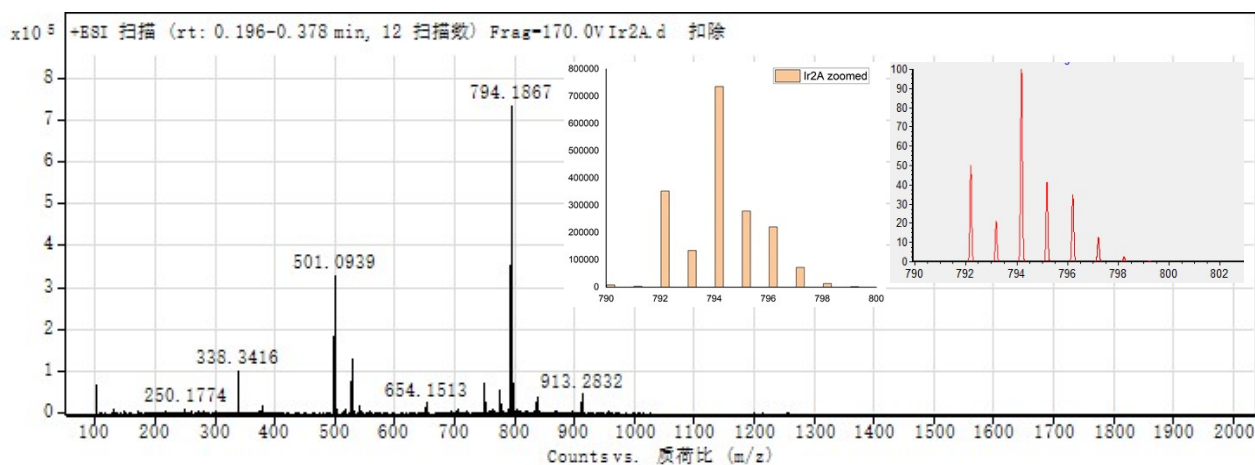

Fig.S8 ESI-MS for complex Ir2A. Inserted are the zoomed mass spectrum (yellow) and simulated isotope distribution using IsoPro 3.0 (red)

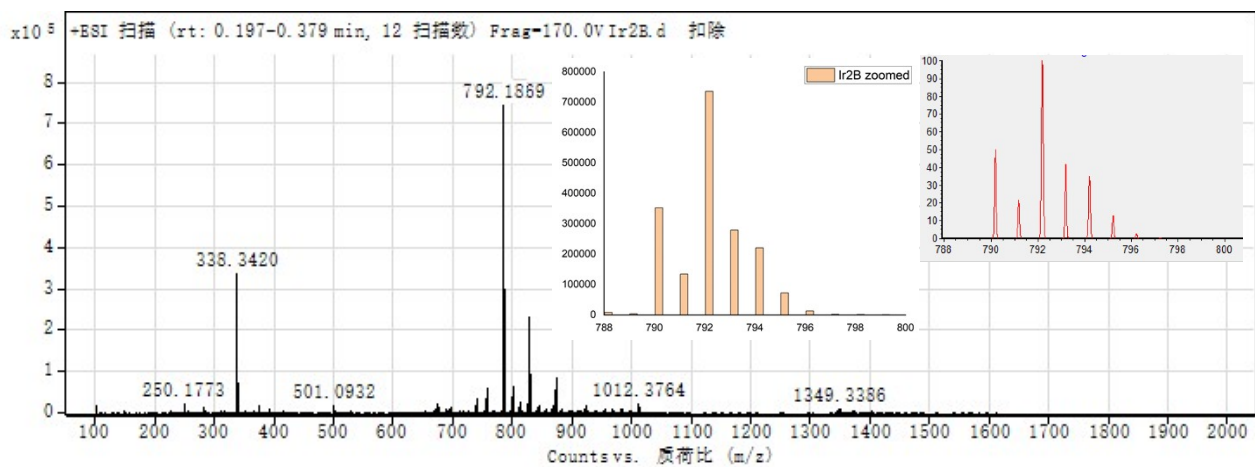

Fig.S9 ESI-MS for complex Ir2B. Inserted are the zoomed mass spectrum (yellow) and simulated isotope distribution using IsoPro 3.0 (red)

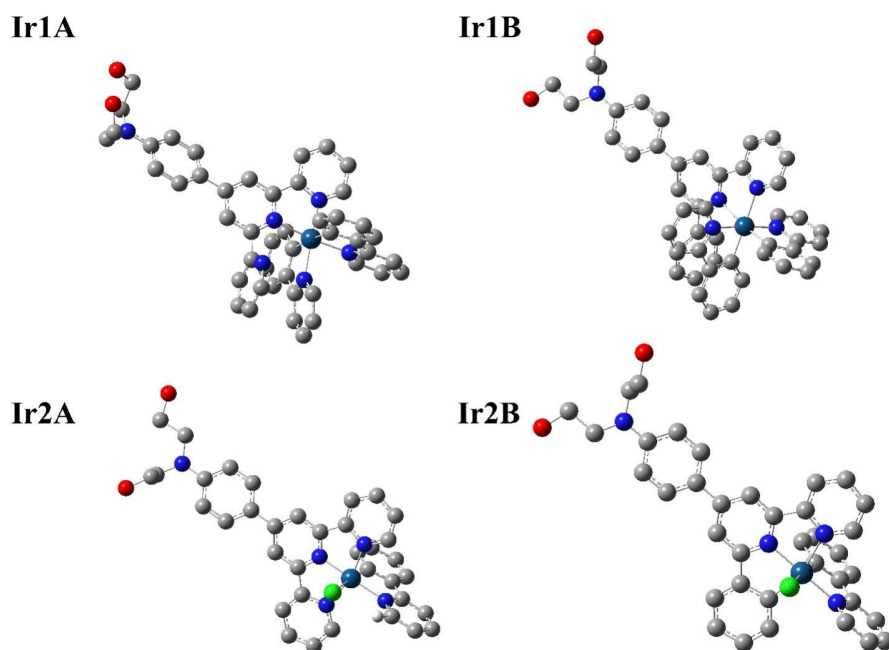

Fig.S10 Three-dimensional molecular structure of four iridium (III) complexes (Ir1A~Ir2B) optimized via Gaussian calculations.

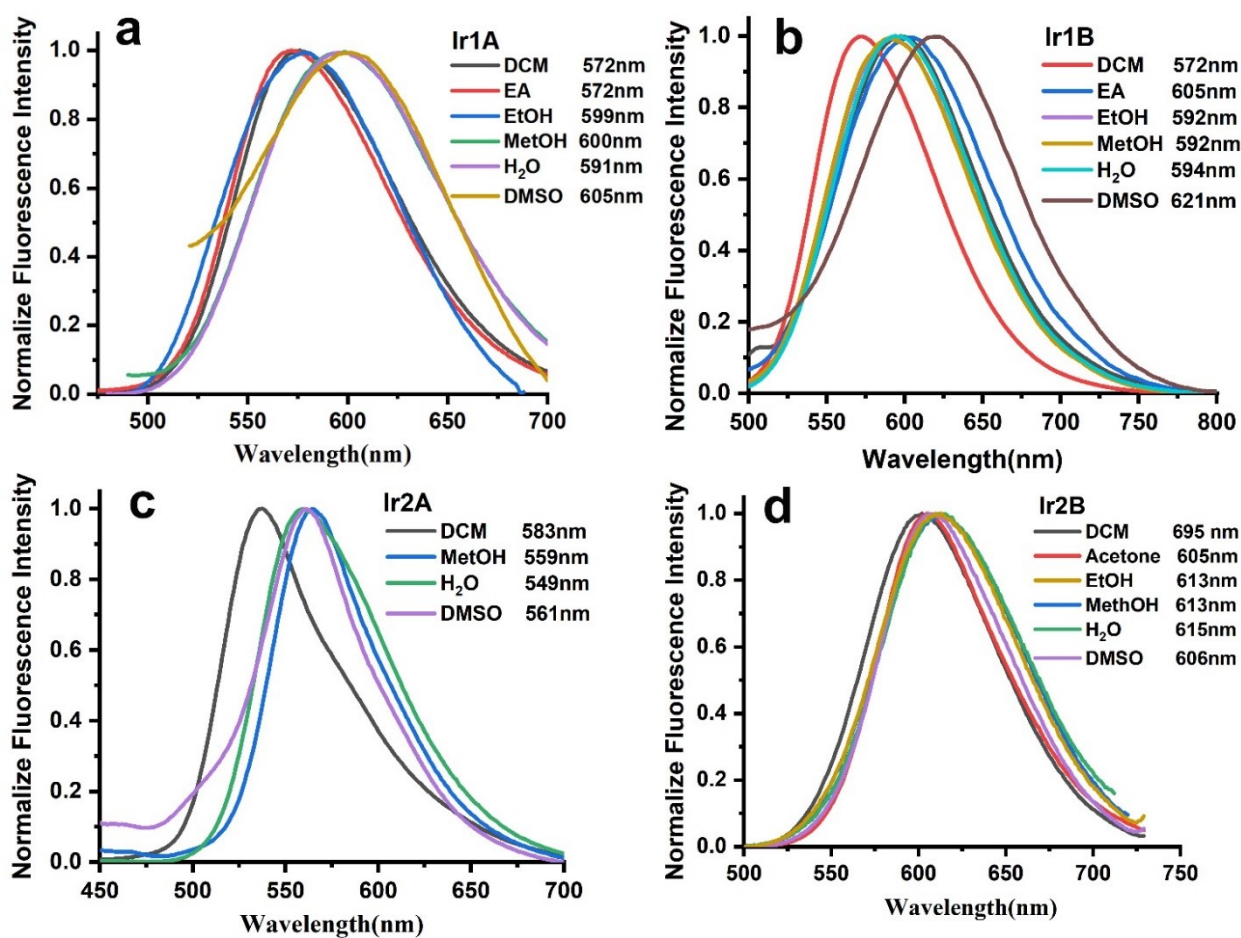

Fig.S11 Normalized one-photon excited fluorescence spectra of four iridium(III) complexes (Ir1A~Ir2B) in different solvents.



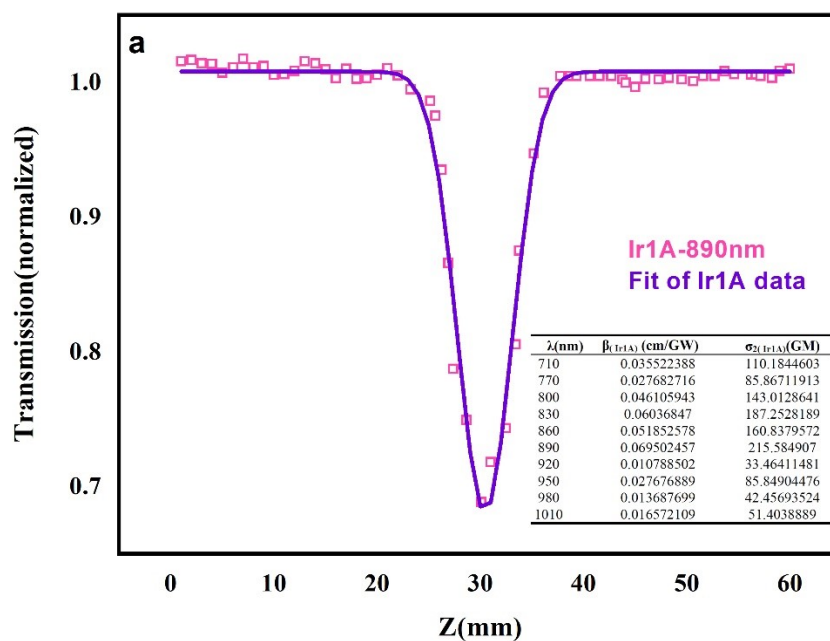

Fig. S12 Open-aperture Z-scan experimental data and fitting curves for Complexes Ir1A in DMSO solution. ( $1.0 \times 10^{-3}$  M)

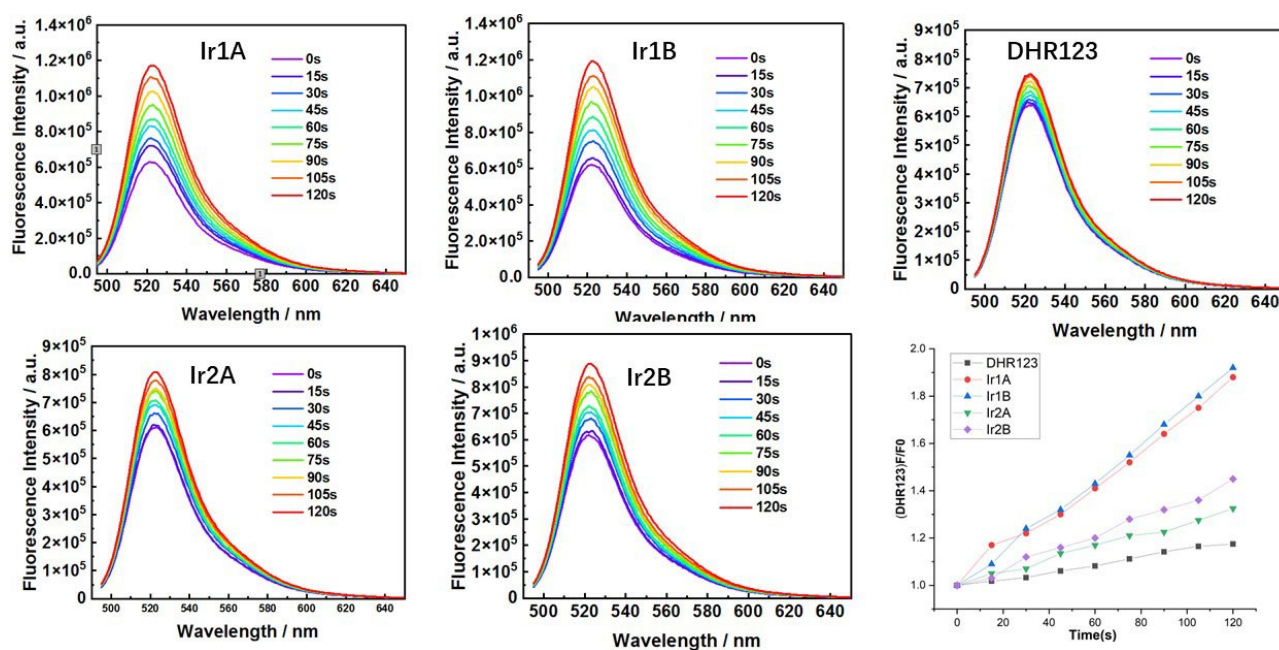

Fig.S13 One-photon excited fluorescence spectra of DHR123 in the absence and presence of iridium(III) complexes Ir1A~Ir2B. (solvent: acetonitrile).

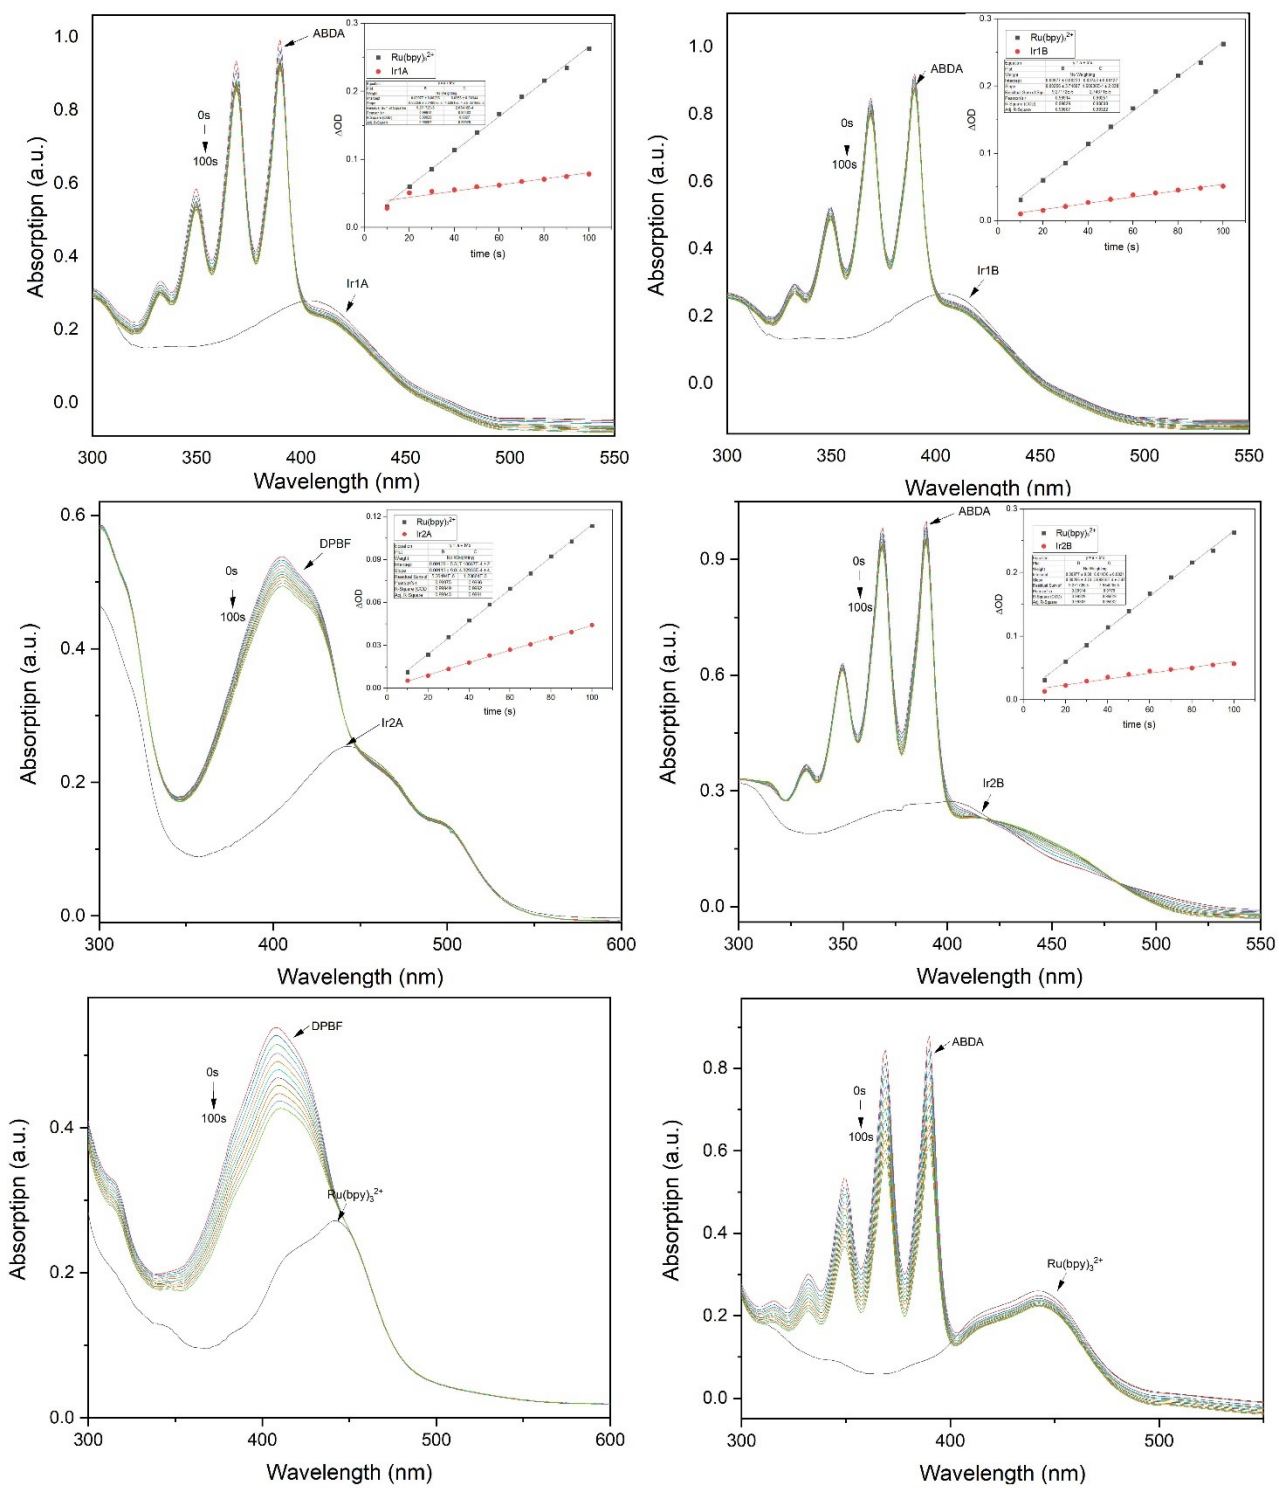

Fig.S14 Absorption spectra of DHR123 in the absence and presence of iridium(III) complexes Ir1A~Ir2B. (Solvent: acetonitrile).



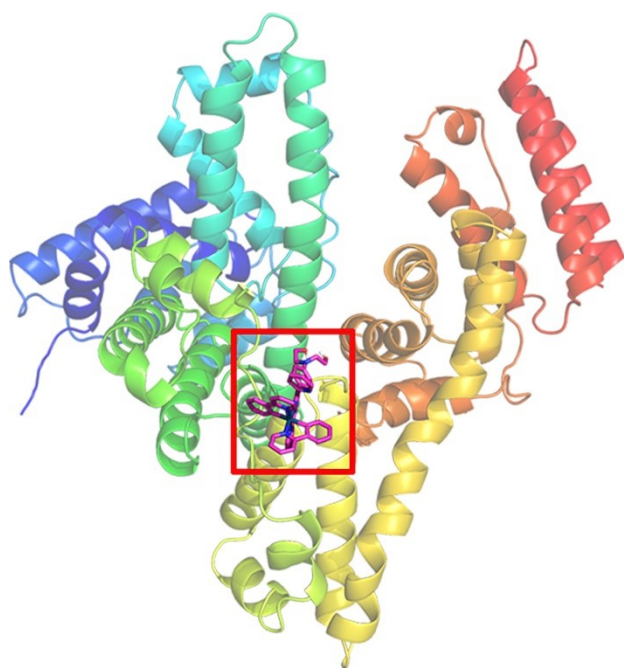

Ir1A-BSA

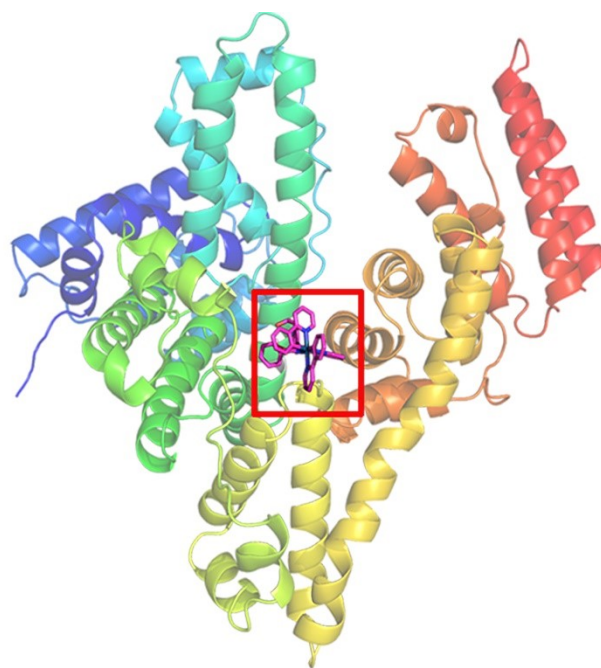

Ir1B-BSA

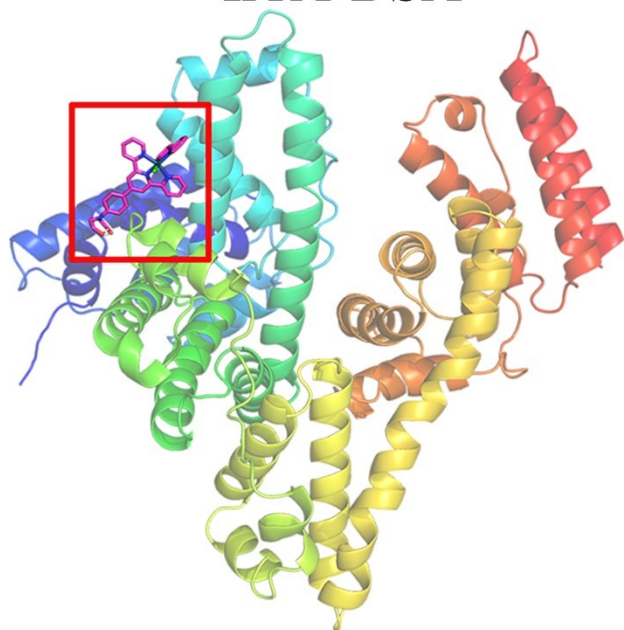

Ir2A-BSA

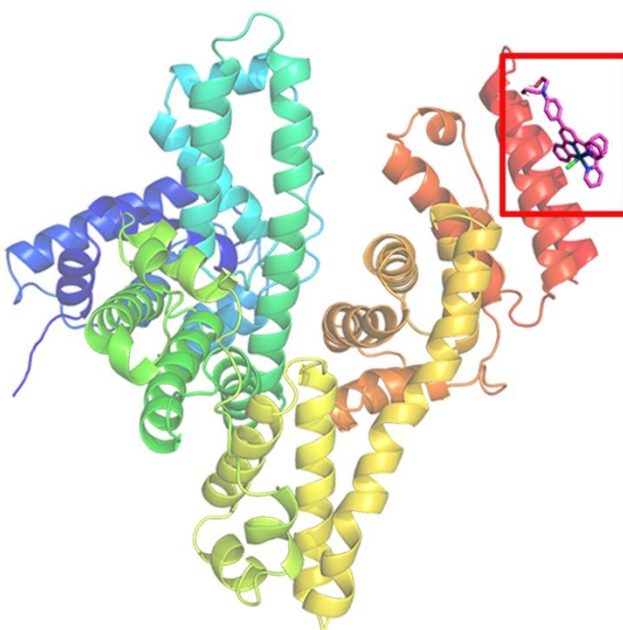

Ir2B-BSA

Fig. S15 Theoretical simulation of the interaction mode between the Ir(III) complex with BSA.

| Comple<br>x | DNA                            |                                                                                                   |
|-------------|--------------------------------|---------------------------------------------------------------------------------------------------|
|             | Autodock<br>scores ( kcal/mol) | Hydrogen bonding                                                                                  |
| Ir1A        | -4.68                          | (Ir1A)H57...OP2(DA-18) (1.9 Å)<br>(Ir1A)H58...OP2(DA-18) (1.8 Å)<br>(Ir1A)N14...H7(DA-17) (2.0 Å) |
| Ir1B        | -4.59                          | (Ir1B)O56...H42(DC-9) (2.0 Å)                                                                     |
| Ir2A        | -4.33                          | (Ir2A)H72...OP2(DC-21) (1.8 Å)<br>(Ir2A)H77...OP2(DC-21) (2.3 Å)                                  |
| Ir2B        | -4.76                          | (Ir2B)O40...H21(DG-10) (1.8 Å)<br>(Ir2B)H72...O2(DC-11) (2.1 Å)                                   |
| Comple<br>x | BSA                            |                                                                                                   |
|             | Autodock<br>scores ( kcal/mol) | Hydrogen bonding                                                                                  |
| Ir1A        | -2.41                          | (Ir1A)H57...O(PRO-338) (2.1 Å)                                                                    |
| Ir1B        | -2.99                          | (Ir1B)O56...H11(ARG-217) (2.2 Å)                                                                  |
| Ir2A        | -3.19                          | (Ir2A)N27...OE2(GLU-284) (3.0 Å)                                                                  |
| Ir2B        | -3.34                          | —                                                                                                 |

Table S1 Autodock results for the binding of the four Ir(III) complexes with DNA or BSA

| Interaction with DNA or BSA | isobestic point | Hypochromism of MLCT band  |
|-----------------------------|-----------------|----------------------------|
| Ir1A-DNA                    | /               | $\lambda_{405}$ 23.6%      |
| Ir1B-DNA                    | /               | $\lambda_{425}$ 14.3% with |
| Ir2A-DNA                    | 324 and 486nm   | $\lambda_{445}$ 42.5%      |
| Ir2B-DNA                    | 284nm           | $\lambda_{423}$ 9.8%       |
| Ir1A-BSA                    | 293nm           | $\lambda_{405}$ 27.8%      |
| Ir1B-BSA                    | 297nm           | $\lambda_{425}$ 5.6%       |
| Ir2A-BSA                    | 303nm           | $\lambda_{445}$ 10.0%      |
| Ir2B-BSA                    | 297nm           | $\lambda_{423}$ 8.9%       |

Table S2 Interaction of the Ir(III) complexes with DNA or BSA studied by UV-vis titration experiments.

|    |          |          |          |   |          |          |          |
|----|----------|----------|----------|---|----------|----------|----------|
| Ir | 2.17414  | -0.41517 | 0.08432  | C | 6.23112  | -1.31668 | 1.33392  |
| O  | -10.1024 | 0.17545  | -2.06799 | C | 3.86317  | -1.29675 | -2.18406 |
| O  | -10.6467 | -1.70798 | -0.16007 | C | 2.40704  | 1.97496  | 3.68086  |
| N  | -8.41165 | 0.4223   | 0.47079  | C | -4.89805 | 1.22126  | -0.40391 |
| N  | 0.11154  | -0.07709 | -0.07127 | C | 1.7507   | 1.27316  | 4.68887  |
| N  | 1.44465  | -2.30363 | 0.3346   | C | 1.31752  | -0.53742 | 3.13236  |
| N  | 3.05708  | 1.49385  | 0.06748  | C | -9.55761 | -1.81255 | 0.74631  |
| N  | 4.16875  | -0.97719 | 0.1689   | C | 1.69347  | -4.65683 | 0.67501  |
| C  | 1.96918  | 0.14197  | 2.0929   | H | -9.86853 | -0.19595 | -2.93413 |
| C  | -6.31316 | -0.71493 | 0.99664  | H | -10.3833 | -1.0869  | -0.87741 |
| C  | 4.63447  | 3.76614  | 0.29996  | H | -6.82801 | -1.49039 | 1.54869  |
| C  | 2.53428  | -0.87183 | -1.9258  | H | 5.25355  | 4.65267  | 0.39726  |
| C  | 1.19436  | 3.51746  | -2.36125 | H | 1.48987  | 3.55052  | -3.40761 |
| N  | 0.59653  | 2.39079  | -1.95335 | H | 0.10042  | 3.23926  | 1.28038  |
| C  | 0.22596  | 2.31745  | -0.66449 | H | 1.23338  | 5.33582  | 0.50026  |
| C  | 0.42067  | 3.35306  | 0.2504   | H | 1.93669  | 5.48973  | -1.9088  |
| C  | 1.05131  | 4.51638  | -0.18827 | H | -6.76566 | 2.13026  | -0.82995 |
| C  | 1.44274  | 4.60407  | -1.5225  | H | 7.90265  | -1.94309 | 0.11481  |
| C  | -6.27895 | 1.30272  | -0.33136 | H | -2.58764 | -2.03582 | 0.45965  |
| C  | 6.85177  | -1.67127 | 0.13426  | H | 0.69542  | -0.53716 | 5.1999   |
| C  | -2.03507 | -1.12543 | 0.27379  | H | 4.11451  | 3.70038  | 2.38462  |

|   |          |          |          |   |          |          |          |
|---|----------|----------|----------|---|----------|----------|----------|
| C | 1.20755  | 0.01282  | 4.41323  | H | -4.43035 | -1.59932 | 1.4203   |
| C | 4.75464  | -1.32151 | -1.01951 | H | 5.30101  | -1.99447 | -3.6591  |
| C | 0.09306  | -2.43494 | 0.36466  | H | 3.6915   | -1.92918 | -5.52674 |
| C | 3.99235  | 3.23733  | 1.41279  | H | -8.56439 | -0.64232 | 2.26804  |
| C | -4.93268 | -0.78434 | 0.90841  | H | -10.0643 | 0.0535   | 1.67546  |
| C | 3.20484  | 2.08749  | 1.29062  | H | -2.35303 | 2.18354  | -0.32097 |
| C | 4.28022  | -1.67284 | -3.47272 | H | 4.94601  | 3.52309  | -1.83511 |
| C | -2.7193  | 0.08749  | 0.10707  | H | -1.5748  | -3.78647 | 0.56982  |
| C | 3.37426  | -1.63816 | -4.52913 | H | -8.69601 | 2.44372  | -0.06493 |
| C | -0.53367 | 1.09443  | -0.27632 | H | -10.1578 | 1.48786  | 0.12477  |
| C | -9.15547 | -0.46903 | 1.36274  | H | 6.5791   | -1.94222 | -1.97848 |
| C | -1.915   | 1.20345  | -0.1769  | H | -9.55943 | 2.17595  | -2.23929 |
| C | -0.6509  | -1.18317 | 0.18698  | H | -8.20782 | 1.02543  | -2.17923 |
| C | 4.47212  | 3.14334  | -0.93698 | H | 3.50901  | 1.49172  | -1.94409 |
| C | -4.17952 | 0.17638  | 0.20675  | H | -0.14179 | -5.78631 | 0.85346  |
| C | 2.51823  | 1.41349  | 2.39769  | H | 4.35452  | -0.68995 | 2.20455  |
| C | -0.49711 | -3.68742 | 0.55133  | H | 3.29324  | -3.22531 | 0.45239  |
| C | -9.13657 | 1.45858  | -0.26236 | H | 1.34313  | -1.21397 | -5.11898 |
| C | 6.11034  | -1.67231 | -1.03985 | H | 0.61713  | -0.54582 | -2.85958 |
| C | -9.19876 | 1.24913  | -1.77228 | H | 6.77058  | -1.30223 | 2.27421  |
| C | 3.67214  | 2.01208  | -1.01055 | H | 2.81823  | 2.95736  | 3.897    |
| C | -7.03975 | 0.33646  | 0.3784   | H | -4.37313 | 1.9793   | -0.97677 |
| C | 0.30724  | -4.80929 | 0.70896  | H | 1.65897  | 1.70584  | 5.68129  |
| C | 4.88864  | -0.97411 | 1.30783  | H | 0.88016  | -1.51732 | 2.9477   |
| C | 2.22585  | -3.39115 | 0.48475  | H | -8.68429 | -2.27756 | 0.26416  |
| C | 2.0539   | -1.23498 | -4.2955  | H | -9.88453 | -2.48051 | 1.55183  |
| C | 1.6468   | -0.86023 | -3.012   | H | 2.36175  | -5.50247 | 0.79208  |

Table S3 The xyz coordinates for complex Ir1A

|   |          |          |          |   |          |          |          |
|---|----------|----------|----------|---|----------|----------|----------|
| C | -3.91092 | 4.1347   | 1.12162  | N | 8.36659  | -0.01772 | -0.4561  |
| C | -4.27942 | 3.56176  | -0.10183 | C | 9.11879  | -1.26619 | -0.33976 |
| C | -3.81627 | 2.29482  | -0.46262 | C | 9.10272  | -1.83959 | 1.07539  |
| C | -2.9683  | 1.5624   | 0.3804   | O | 9.90154  | -3.02228 | 1.05419  |
| C | -2.60654 | 2.15829  | 1.61726  | C | 9.03147  | 1.22346  | -0.05232 |
| C | -3.07261 | 3.43152  | 1.98087  | C | 10.51912 | 1.26793  | -0.38368 |
| C | -4.53391 | -0.90043 | 2.17754  | O | 10.91912 | 2.62168  | -0.16953 |
| C | -5.84791 | -1.23685 | 2.51378  | H | -4.27641 | 5.11896  | 1.40054  |
| C | -6.7976  | -1.48304 | 1.51534  | H | -4.93227 | 4.10909  | -0.77807 |
| C | -6.42611 | -1.39644 | 0.17622  | H | -4.11896 | 1.87639  | -1.41853 |
| C | -5.10658 | -1.06103 | -0.16424 | H | -2.79145 | 3.87222  | 2.93309  |
| C | -4.133   | -0.8063  | 0.83788  | H | -3.81771 | -0.7069  | 2.97113  |
| C | -1.73602 | 1.34905  | 2.46646  | H | -6.13564 | -1.30405 | 3.56043  |
| C | -4.61629 | -0.99231 | -1.54191 | H | -7.81878 | -1.74162 | 1.78052  |
| N | -1.481   | 0.09687  | 1.97974  | H | -7.16282 | -1.59333 | -0.59741 |
| C | -0.7073  | -0.75526 | 2.67875  | H | -0.56251 | -1.73777 | 2.24872  |
| C | -0.12948 | -0.40748 | 3.88981  | H | 0.48743  | -1.12689 | 4.41652  |
| C | -0.36249 | 0.87328  | 4.39722  | H | 0.07867  | 1.18318  | 5.33952  |
| C | -1.16952 | 1.74913  | 3.68298  | H | -1.36169 | 2.74643  | 4.06038  |
| C | -5.36822 | -1.22278 | -2.69898 | H | -6.42646 | -1.44184 | -2.61702 |
| C | -4.75582 | -1.17635 | -3.94566 | H | -5.3376  | -1.35177 | -4.84529 |
| C | -3.38509 | -0.9191  | -4.02511 | H | -2.86307 | -0.89534 | -4.97508 |

|    |          |          |          |   |          |          |          |
|----|----------|----------|----------|---|----------|----------|----------|
| C  | -2.68494 | -0.69058 | -2.85012 | H | -1.62031 | -0.50013 | -2.84407 |
| N  | -3.28513 | -0.69965 | -1.64655 | H | 6.78532  | -2.15545 | -0.98171 |
| Ir | -2.31254 | -0.3366  | 0.1357   | H | 4.38599  | -2.17547 | -1.0633  |
| C  | 6.26252  | -1.23737 | -0.74575 | H | 4.28821  | 1.96802  | 0.10962  |
| C  | 4.87847  | -1.2499  | -0.78198 | H | 6.69135  | 2.01446  | 0.18045  |
| C  | 4.11389  | -0.1007  | -0.50144 | H | 2.41918  | -2.24473 | -0.25529 |
| C  | 4.82486  | 1.06473  | -0.16407 | H | 2.38456  | 1.99914  | -0.95063 |
| C  | 6.21084  | 1.09285  | -0.11997 | H | -2.54277 | -5.59325 | 0.07893  |
| C  | 6.98144  | -0.05506 | -0.43312 | H | -3.38965 | -3.26384 | 0.37223  |
| C  | 1.9112   | -1.30716 | -0.43569 | H | 1.31983  | -3.92048 | -0.81659 |
| C  | 0.52312  | -1.28754 | -0.48211 | H | -0.12103 | -5.91874 | -0.52868 |
| N  | -0.18769 | -0.13536 | -0.62821 | H | -0.91739 | 1.5295   | -3.05273 |
| C  | 0.50354  | 1.01272  | -0.81176 | H | 0.36892  | 3.28855  | 0.65014  |
| C  | 1.8962   | 1.04957  | -0.76977 | H | -0.7123  | 5.42767  | 0.0094   |
| C  | 2.64736  | -0.11708 | -0.55986 | H | -1.8934  | 5.62097  | -2.17012 |
| C  | -1.87329 | -4.74956 | -0.04694 | H | -1.99418 | 3.66173  | -3.69977 |
| C  | -2.35468 | -3.45699 | 0.11779  | H | 8.72712  | -2.0039  | -1.04339 |
| N  | -1.56943 | -2.37611 | -0.02289 | H | 10.15166 | -1.08936 | -0.64084 |
| C  | -0.26319 | -2.53194 | -0.34178 | H | 9.5087   | -1.10042 | 1.78132  |
| C  | 0.28091  | -3.80524 | -0.53346 | H | 8.07069  | -2.06273 | 1.38021  |
| C  | -0.53105 | -4.92483 | -0.38092 | H | 9.90267  | -3.39288 | 1.9518   |
| C  | -0.88724 | 2.37683  | -2.37668 | H | 8.57202  | 2.05077  | -0.60055 |
| C  | -0.22156 | 2.26407  | -1.14938 | H | 8.89531  | 1.4274   | 1.02065  |
| C  | -0.1494  | 3.37486  | -0.30031 | H | 11.09947 | 0.59415  | 0.2595   |
| C  | -0.75636 | 4.57689  | -0.6644  | H | 10.68077 | 0.97027  | -1.43002 |
| C  | -1.42242 | 4.68368  | -1.88749 | H | 11.8809  | 2.66284  | -0.2981  |
| C  | -1.48386 | 3.58224  | -2.74391 |   |          |          |          |

Table S4 The xyz coordinates for complex Ir1B

|   |          |          |          |    |          |          |          |
|---|----------|----------|----------|----|----------|----------|----------|
| C | 2.42887  | 1.03375  | -3.80988 | O  | -9.53713 | -2.26863 | 1.96664  |
| C | 2.00128  | 0.68095  | -2.52666 | Ir | 2.51663  | -0.09063 | 0.39136  |
| C | 2.92882  | 0.42483  | -1.51113 | Cl | 2.17326  | -0.75224 | 2.82999  |
| C | 4.30981  | 0.53182  | -1.81134 | O  | -10.4691 | 2.43202  | -1.31624 |
| C | 4.73308  | 0.88614  | -3.10203 | C  | -8.65779 | -1.1907  | 0.04132  |
| C | 3.79362  | 1.13636  | -4.09904 | C  | -8.78802 | -1.12391 | 1.56145  |
| C | 6.62284  | 0.30106  | -0.76007 | H  | 4.12282  | 1.41088  | -5.09705 |
| C | 5.22622  | 0.2565   | -0.70169 | H  | 7.11649  | 0.55645  | -1.69008 |
| N | 4.60642  | -0.0666  | 0.47272  | H  | 4.75975  | -0.58315 | 2.46081  |
| C | 5.33155  | -0.3394  | 1.5734   | H  | 7.26649  | -0.53428 | 2.47278  |
| C | 6.71833  | -0.30812 | 1.56496  | H  | 8.45713  | 0.0516   | 0.33305  |
| C | 7.37281  | 0.018    | 0.37533  | H  | -6.23156 | 2.03129  | -0.86315 |
| C | -5.74691 | 1.10022  | -0.60206 | H  | -3.83199 | 2.01818  | -0.70315 |
| C | -4.36414 | 1.09456  | -0.49547 | H  | -3.90634 | -2.15285 | 0.36628  |
| C | -3.64939 | -0.0693  | -0.1623  | H  | -6.30258 | -2.16801 | 0.19712  |
| C | -4.40433 | -1.23502 | 0.06843  | H  | -1.94111 | -2.14874 | -0.60498 |
| C | -5.78608 | -1.24289 | -0.02314 | H  | -2.02865 | 2.0071   | 0.5595   |
| C | -6.50908 | -0.07425 | -0.37732 | H  | 3.59395  | -5.02499 | -0.86426 |
| C | -1.44014 | -1.24099 | -0.29412 | H  | 4.16412  | -2.69426 | -0.16305 |
| C | -0.05806 | -1.22395 | -0.16363 | H  | -0.54833 | -3.84332 | -0.94188 |
| N | 0.55914  | -0.07735 | 0.19166  | H  | 1.17974  | -5.6042  | -1.26029 |
| C | -1.48688 | 1.09874  | 0.32884  | H  | -0.69846 | 3.71661  | 1.04085  |

|   |          |          |          |   |          |          |          |
|---|----------|----------|----------|---|----------|----------|----------|
| C | -0.10319 | 1.07281  | 0.43778  | H | 4.05926  | 2.50611  | 1.22011  |
| C | -2.18567 | -0.06923 | -0.0441  | H | 3.39588  | 4.85844  | 1.74104  |
| C | 2.8086   | -4.2887  | -0.73597 | H | 0.95911  | 5.46944  | 1.64651  |
| C | 3.13976  | -2.99539 | -0.34553 | H | -8.41598 | 1.86388  | 0.17064  |
| N | 2.20628  | -2.04916 | -0.17079 | H | -8.11769 | 1.71334  | -1.56367 |
| C | 0.88238  | -2.34233 | -0.3823  | H | -10.238  | 0.41895  | -1.82844 |
| C | 0.4989   | -3.62064 | -0.7753  | H | -10.6112 | 0.73779  | -0.1164  |
| C | 1.46993  | -4.60465 | -0.95398 | H | -11.4359 | 2.42041  | -1.40543 |
| C | 0.3572   | 3.47844  | 1.09116  | H | -9.65247 | -1.19664 | -0.40616 |
| C | 0.79202  | 2.18646  | 0.81321  | H | -8.19847 | -2.13847 | -0.24775 |
| N | 2.12745  | 1.87562  | 0.87132  | H | -7.79189 | -1.11748 | 2.02551  |
| C | 3.02283  | 2.81967  | 1.19487  | H | -9.29801 | -0.19348 | 1.8506   |
| C | 2.63994  | 4.12549  | 1.48314  | H | -9.62598 | -2.23466 | 2.93306  |
| C | 1.28887  | 4.45883  | 1.4296   | H | 1.69496  | 1.22936  | -4.58781 |
| N | -7.88734 | -0.07991 | -0.5142  | H | 0.93649  | 0.60885  | -2.32408 |
| C | -8.56253 | 1.20818  | -0.7008  | H | 5.79087  | 0.96811  | -3.334   |
| C | -10.0559 | 1.10476  | -0.98874 |   |          |          |          |

Table S5 The xyz coordinates for complex Ir2A

|   |          |          |          |    |          |          |          |
|---|----------|----------|----------|----|----------|----------|----------|
| C | 2.45973  | -0.26386 | 3.92223  | C  | -8.61161 | 1.30546  | -0.16221 |
| C | 2.03256  | -0.15494 | 2.59707  | C  | -10.0976 | 1.38118  | 0.16955  |
| C | 2.95578  | -0.09024 | 1.54204  | O  | -10.5523 | 2.60697  | -0.40569 |
| C | 4.33798  | -0.13331 | 1.86678  | Ir | 2.54712  | 0.03895  | -0.41537 |
| C | 4.76259  | -0.24276 | 3.20081  | Cl | 2.22098  | 0.11076  | -2.96609 |
| C | 3.82542  | -0.30823 | 4.22823  | O  | -9.43782 | -3.09027 | -0.11797 |
| C | 6.65062  | -0.06725 | 0.79492  | H  | 0.96716  | -0.1198  | 2.38665  |
| C | 5.25283  | -0.05447 | 0.72762  | H  | 5.82168  | -0.2749  | 3.44094  |
| N | 4.62784  | 0.042    | -0.48554 | H  | 4.15461  | -0.3917  | 5.26017  |
| C | 5.35853  | 0.1293   | -1.61344 | H  | 7.14092  | -0.14892 | 1.75806  |
| C | 6.74573  | 0.12592  | -1.59814 | H  | 4.78736  | 0.20075  | -2.53143 |
| C | 7.40291  | 0.02422  | -0.36961 | H  | 7.29276  | 0.20056  | -2.53164 |
| C | -5.74667 | -0.91666 | 0.84668  | H  | 8.48759  | 0.01667  | -0.32078 |
| C | -4.36487 | -0.93088 | 0.73655  | H  | -6.22712 | -1.7642  | 1.31834  |
| C | -3.65432 | 0.13084  | 0.14745  | H  | -3.82658 | -1.78201 | 1.14344  |
| C | -4.41228 | 1.2113   | -0.33301 | H  | -3.91661 | 2.03913  | -0.83159 |
| C | -5.79748 | 1.23598  | -0.23958 | H  | -6.31942 | 2.08362  | -0.66316 |
| C | -6.51335 | 0.17542  | 0.36805  | H  | -1.92954 | 2.24553  | 0.15809  |
| C | -1.43476 | 1.29047  | 0.03123  | H  | -2.04738 | -2.04966 | -0.15277 |
| C | -0.04762 | 1.2517   | -0.09658 | H  | 3.55133  | 5.20105  | -0.13594 |
| N | 0.56761  | 0.04651  | -0.21582 | H  | 4.26887  | 2.84927  | -0.36103 |
| C | -0.11286 | -1.12219 | -0.22175 | H  | -0.55393 | 3.96743  | 0.12606  |
| C | -1.49738 | -1.1186  | -0.10803 | H  | 1.14232  | 5.76923  | 0.10466  |
| C | -2.18706 | 0.10336  | 0.02447  | H  | -0.81223 | -3.81046 | -0.22589 |
| C | 2.80619  | 4.40837  | -0.12997 | H  | 3.97542  | -2.85333 | -0.7212  |
| C | 3.20998  | 3.07523  | -0.2566  | H  | 3.22008  | -5.23985 | -0.71667 |
| C | 2.27832  | 2.02852  | -0.25489 | H  | 0.76306  | -5.7146  | -0.46339 |
| C | 0.89798  | 2.37799  | -0.10688 | H  | -8.1515  | -1.58223 | 1.56046  |
| C | 0.49806  | 3.71565  | 0.01828  | H  | -9.62979 | -0.79658 | 1.08796  |
| C | 1.4517   | 4.7324   | 0.00631  | H  | -9.21851 | -1.38312 | -1.30696 |
| C | 0.24929  | -3.62805 | -0.34278 | H  | -7.7006  | -2.18082 | -0.8456  |
| C | 0.74215  | -2.32264 | -0.35896 | H  | -9.49945 | -3.66276 | -0.89989 |



|   |          |          |          |   |          |          |          |
|---|----------|----------|----------|---|----------|----------|----------|
| N | 2.07741  | -2.08615 | -0.49599 | H | -8.17537 | 2.25498  | 0.16279  |
| C | 2.92736  | -3.11364 | -0.61772 | H | -8.49627 | 1.25367  | -1.25586 |
| C | 2.49792  | -4.43723 | -0.61406 | H | -10.6504 | 0.53392  | -0.25553 |
| C | 1.1353   | -4.6952  | -0.47383 | H | -10.2473 | 1.37887  | 1.25892  |
| N | -7.89595 | 0.21513  | 0.50534  | H | -11.5173 | 2.63549  | -0.30185 |
| C | -8.62192 | -1.03137 | 0.74313  | H | 1.72511  | -0.31241 | 4.72298  |
| C | -8.70933 | -1.92202 | -0.49472 |   |          |          |          |

Table S6 The xyz coordinates for complex Ir2B

| Complex       | Ir1A        | Ir1B        | Ir2A        | Ir2B        |
|---------------|-------------|-------------|-------------|-------------|
| Lifetime(ns)  | 3.104±0.127 | 2.913±0.070 | 3.089±0.056 | 3.242±0.053 |
| quantum yield | 0.64        | 0.80        | 0.54        | 0.90        |

Table S7 The lifetime and quantum yield for the four complexes

Details for the fit of emission decay curve

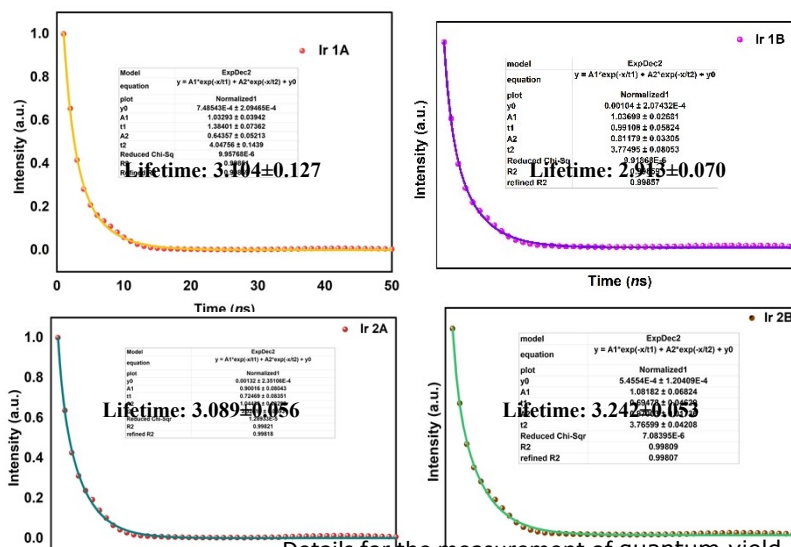

Details for the measurement of quantum yield

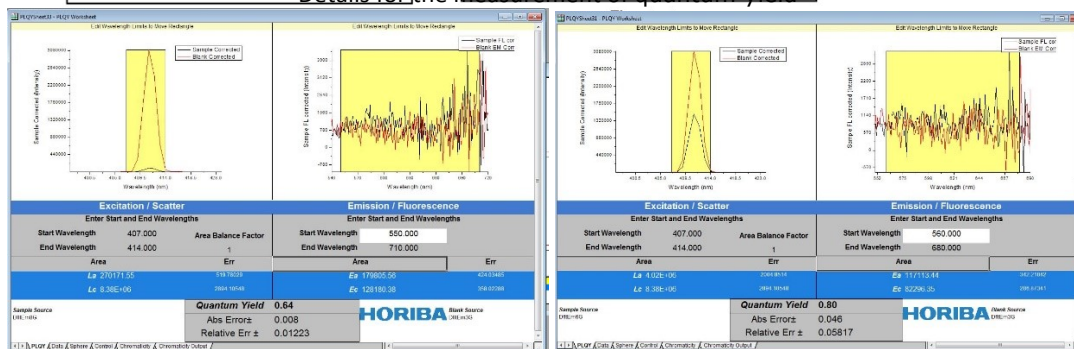

Ir1A

Ir1B

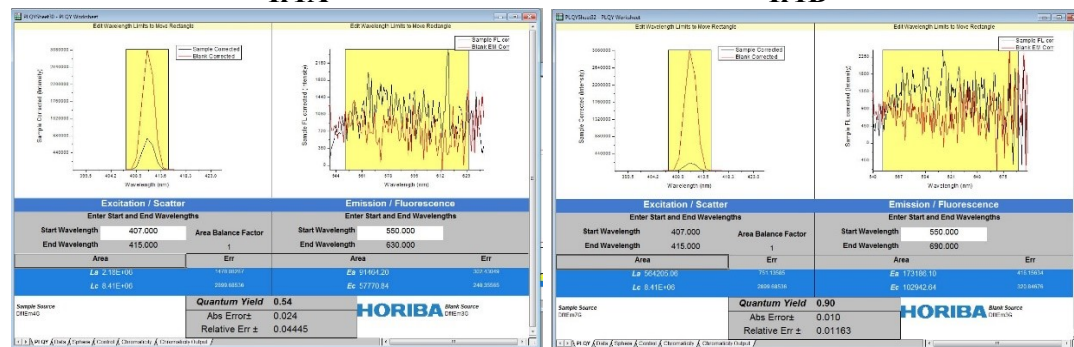

Ir2A

Ir2B
